# Supplementary material for: Probing planetary biodiversity with DNA barcodes: The Noctuoidea of North America
Source: PLoS One. 2017 Jun 1;12(6):e0178548. doi: 10.1371/journal.pone.0178548 (PMC5453547; doi:10.1371/journal.pone.0178548)
Supplement: S8 Table — List of North American noctuoid species sharing a barcode haplotype. (XLS) [file pone.0178548.s010.xls]

## Sheet: S8
Table S8
Family	Subfamily	Species prob valid (green), NOT shared, synonymized or fixed misidentifications (red), possible synonyms (yellow)	# species sharing barcodes	Notes
Notodontidae	Phalerinae	Datana neomexicana	2
	Phalerinae	Datana rotunda
	Heterocampinae	Hyparpax aurora	2	possible synonyms
	Heterocampinae	Hyparpax perophoroides		possible synonyms
Nolidae	Risobinae	Baileya acadiana	2	possible synonyms
		Baileya dormitans		possible synonyms
Erebidae	Erebinae	Catocala angusi	2
		Catocala luctuosa
		Catocala antinympha	2
		Catocala badia
		Catocala briseis	2
		Catocala californica
		Catocala electilis	2
		Catocala irene
		Catocala faustina	2
		Catocala hermia
		Catocala faustina	2
		Catocala californica
		Catocala flebilis	2
		Catocala retecta
		Catocala grotiana	2
		Catocala semirelicta
		Catocala habilis	2
		Catocala retecta
		Catocala hermia	2
		Catocala californica
		Catocala ilia	2
		Catocala umbrosa
		Catocala irene	2
		Catocala junctura
		Catocala jessica	2
		Catocala junctura
		Catocala luciana	2
		Catocala meskei
		Catocala obscura	2
		Catocala retecta
		Catocala parta	2
		Catocala meskei
		Catocala robinsonii	2
		Catocala retecta
		Catocala sappho	2
		Catocala ulalume
		Catocala semirelicta	2
		Catocala californica
		Drasteria perplexa	2
		Drasteria stretchii
	Arctiinae	Cisthene martini	3	coronado prob. = martini
		Cisthene barnesii
		Cisthene coronado
		Cisthene plumbea	2	plumbea and striatas are probably the same species
		Cisthene striata
		Dodia albertae	2	shared haplotypes
		Dodia verticalis
		Grammia incorrupta	2
		Grammia phyllira
		Grammia parthenice	4
		Grammia virguncula
		Grammia margo
		Grammia quenseli
		Grammia f-pallida	2
		Grammia figurata
		Grammia virguncula	2
		Grammia figurata
		Grammia virguncula	2
		Grammia williamsii
		Grammia williamsii	4
		Grammia margo
		Grammia elongata
		Grammia virguncula
		Grammia f-pallida	2
		Grammia virguncula
		Grammia williamsii	5
		Grammia virguncula
		Grammia quenseli
		Grammia f-pallida
		Grammia franconia
		Grammia williamsii	2
		Grammia franconia
		Grammia nevadensis	2
		Grammia williamsii
		Grammia behrii	2
		Grammia nevadensis
		Grammia quenseli	2
		Grammia yukona
		Grammia williamsii	2
		Grammia blakei
		Grammia bowmani	2
		Grammia williamsii
		Grammia complicata	3
		Grammia elongata
		Grammia ornata
		Haploa clymene	3
		Haploa lecontei
		Haploa confusa
		Haploa lecontei	4
		Haploa confusa
		Haploa colona
		Haploa reversa
		Hypoprepia cadaverosa	2	prob. Same species
		Hypoprepia miniata
		Nelphe relegatum	2	prob same species
		Nelphe carolina
		Pygarctia spraguei	2	prob same species
		Pygarctia abdominalis		prob same species
		Spilosoma pteridis	2
		Spilosoma vagans
		Arctia caja	3
		Arctia opulenta
		Arctia brachyptera
	Scolecocampinae	Gabara pulverosalis	2
		Gabara distema
	Lymantriinae	Dasychira atrivenosa	2
		Dasychira basiflava
		Dasychira meridionalis	2	taxonomic problems; may be same species
		Dasychira basiflava
	Herminiinae	Idia denticulalis	2
		Idia lubricalis	2
Noctuidae	Eustrotiinae	Tripudia balteata	2
		Tripudia munna
	Amphipyrinae	Acopa carina	2
		Acopa perpallida
		Annaphila miona	2
		Annaphila casta
	Plusiinae	Syngrapha abstrusa	4
		Syngrapha alias
		Syngrapha cryptica
		Syngrapha rectangula
		Autoplusia olivacea	2
		Autoplusia egenoides
	Heliothinae	Schinia brunnea	2
		Schinia albafascia
		Schinia fulleri	5
		Schinia volupia
		Schinia sanrafaeli
		Schinia miniana
		Schinia masoni
		Schinia intermontana	2
		Schinia vacciniae
		Schinia lynx	2
		Schinia mcfarlandi		unpublished syn.
		Schinia regia	2
		Schinia regina
	Oncocnemidinae	Sympistis columbia	2
		Sympistis pallida
		Sympistis infixa	2
		Sympistis induta
		Sympistis wilsoni	2
		Sympistis heliophila
		Sympistis dinalda	2
		Sympistis kappa
	Acronictinae	Acronicta albarufa	2	same species
		Acronicta exempta
		Acronicta spinea	3	spinea is valid sp; but australis=lupini
		Acronicta australis
		Acronicta lupini
		Acronicta lepusculina	2	separate species, some shared haplo's
		Acronicta cyanescens
		Acronicta hastulifera	2	separate species, some shared haplo's
		Acronicta dactylina
		Acronicta impressa	2	separate species, some shared haplo's
		Acronicta menyanthidis
	Agaristinae	Alypia octomaculata	2
		Alypia langtoni
	Pantheinae	Panthea virginarius	2
	Pantheinae	Panthea acronyctoides
	Acontiinae	Tarache abdominalis	2
		Tarache flavipennis
		Tarache flavipennis	3
		Tarache knowltoni
		Tarache assimilis
	Noctuinae	Apamea centralis	2
		Apamea commoda
		Bellura brehmei	3	taxonomy unresolved between brehmei/anoa/densa
		Bellura densa
		Bellura anoa	4
		Bellura vulnifica	2	shared haplos
		Bellura gortynoides
		Cobalos angelicus	2
		Cobalos franciscanus
		Dargida rubripennis	2
		Dargida tetera
		Eremobina claudens	2	possible synonyms
		Eremobina unicincta
		Hadena glaciata	2
		Hadena circumvadis
		Hydroeciodes ochrimacula	3
		Hydroeciodes serrata
		Hydroeciodes repleta
		Hyppa potamus	2
		Hyppa contrasta
		Ipimorpha pleonectusa	3
		Ipimorpha nanaimo
		Ipimorpha viridipallida
		Lasionycta anthracina	5
		Lasionycta leucocycla
		Lasionycta frigida
		Lasionycta flanda
		Lasionycta coracina
		Lasionycta sasquatch	3
		Lasionycta poca
		Lasionycta illima
		Lasionycta skraelingia	2
		Lasionycta taigata
		Lithophane patefacta	3
		Lithophane bethunei
		Lithophane disposita
		Lithophane innominata	2
		Lithophane petulca
		Lithophane laceyi	2
		Lithophane unimoda
		Metaxaglaea australis	2
		Metaxaglaea semitaria
		Mythimna yukonensis	2
		Mythimna oxygala
		Papaipema rutila	2
		Papaipema baptisiae
		Polia purpurissata	2
		Polia nugatis
		Resapamea venosa	2
		Resapamea passer
		Trichordestra legitima	2
		Trichordestra dodii
		Xylotype capax	2
		Xylotype arcadia
		Abagrotis cupida	7
		Abagrotis brunneipennis
		Abagrotis belfragei
		Abagrotis cryptica
		Abagrotis discoidalis
		Abagrotis magnicupida
		Abagrotis nefascia
		Abagrotis turbulenta	2
		Abagrotis dickeli
		Abagrotis mirabilis	3
		Abagrotis glenni
		Abagrotis hennei
		Agrotis vancouverensis	2
		Agrotis obliqua
		Agrotis volubilis	2
		Agrotis vancouverensis
		Copablepharon fuscum	3
		Copablepharon atrinotum
		Copablepharon absidum
		Copablepharon spiritum	2
		Copablepharon albisericea
		Copablepharon columbia	2
		Copablepharon mutans
		Dichagyris larga	2
		Dichagyris cyminopristes
		Euxoa austrina	2
		Euxoa altens
		Euxoa macleani	2
		Euxoa apopsis
		Euxoa mimallonis	4
		Euxoa intermontana
		Euxoa biformata
		Euxoa shasta
		Euxoa inyoca	2
		Euxoa brunneigera
		Euxoa macleani	2
		Euxoa apopsis
		Euxoa manitobana	2
		Euxoa taura
		Euxoa melana	2
		Euxoa misturata
		Euxoa infausta	2
		Euxoa occidentalis
		Euxoa spumata	3
		Euxoa punctigera
		Euxoa stigmatalis
		Euxoa taura	2
		Euxoa ridingsiana
		Euxoa selenis	2
		Euxoa satis
		Euxoa divergens	2
		Euxoa sinelinea
		Rhyacia quadrangula	2
		Rhyacia clemens
		Spaelotis unicava	2
		Spaelotis quadricava
		Xestia thula	2
		Xestia alaskae
		Xestia dilucida	3
		Xestia badicollis
		Xestia elimata
		Xestia vernilis	3
		Xestia finatimis
		Xestia verniloides
		Xestia scropulana	3
		Xestia inuitica
		Xestia wockei
		Xestia elimata	3
		Xestia praevia
		Xestia dilucida
		Xestia vernilis	3
		Xestia finatimis
		Xestia infimatis
		Eupsilia morrisoni	2
		Eupsilia vinulenta
Total # species after excluding duplicates		255	299
